# Supplementary material
Source: PubMed Central journal article supplement (PMC8224984)
Supplement: NIHMS1710438-supplement-si.pdf [file NIHMS1710438-supplement-si.pdf]

## Supporting Information

### **[1,2,5]oxadiazolo[3,4-*b*]pyrazine-5,6-diamine Derivatives as Mitochondrial Uncouplers Towards Potential Treatment of Nonalcoholic Steatohepatitis**

Elizabeth S. Childress,<sup>1</sup> Joseph M. Salamoun,<sup>1</sup> Stefan R. Hargett,<sup>2</sup> Stephanie J. Alexopoulos,<sup>3</sup> Sing-Young Chen,<sup>3</sup> Divya P. Shah,<sup>3</sup> José Santiago-Rivera,<sup>1</sup> Christopher J. Garcia,<sup>1</sup> Yumin Dai,<sup>1</sup> Simon P. Tucker,<sup>4</sup> Kyle L. Hoehn,<sup>2,3,\*</sup> and Webster L. Santos<sup>1,\*</sup>

<sup>1</sup>Department of Chemistry and Virginia Tech Center for Drug Discovery, Virginia Tech, Blacksburg, Virginia 24061, United States

<sup>2</sup>Departments of Pharmacology and Medicine, University of Virginia, Charlottesville, Virginia 22908, United States

<sup>3</sup>School of Biotechnology and Biomolecular Sciences, University of New South Wales, Kensington, NSW 2033, Australia

<sup>4</sup>Continuum Biosciences, Pty Ltd Sydney, Australia 2035 and Continuum Biosciences Inc., Boston, Massachusetts 02116, United States

Corresponding Author Email: [santosw@vt.edu](mailto:santosw@vt.edu); [k.hoehn@unsw.edu.au](mailto:k.hoehn@unsw.edu.au)

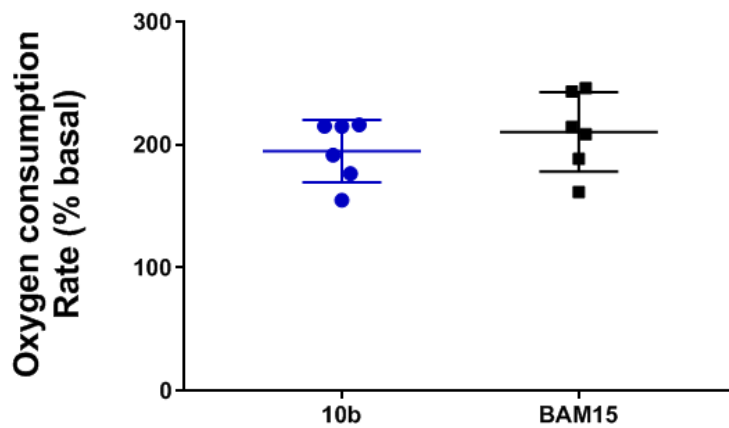

**Figure S1. Compound 10b is bioactive in rat primary hepatocytes.** Rat primary hepatocytes treated with 1  $\mu$ M **BAM15** or 1  $\mu$ M compound **10b** increase cellular oxygen consumption rate by 2-fold in rat primary hepatocytes.

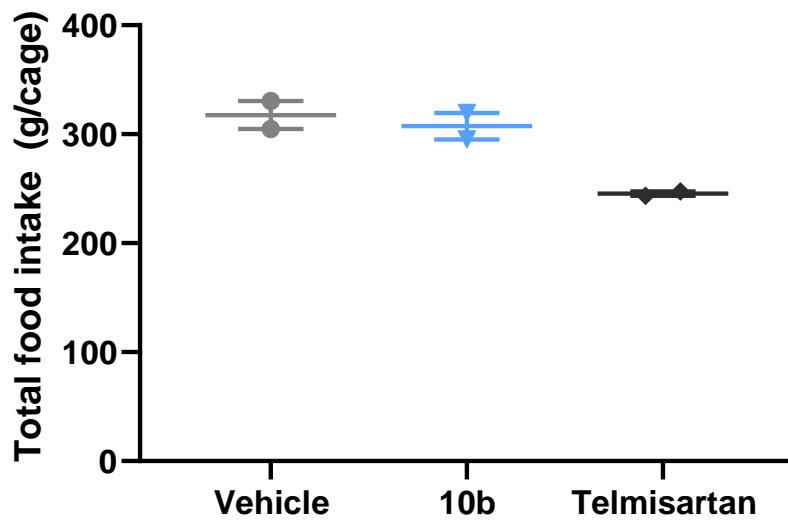

**Figure S2.** Total food intake measured per cage over the duration of the STAM study. n=2 cages per group.

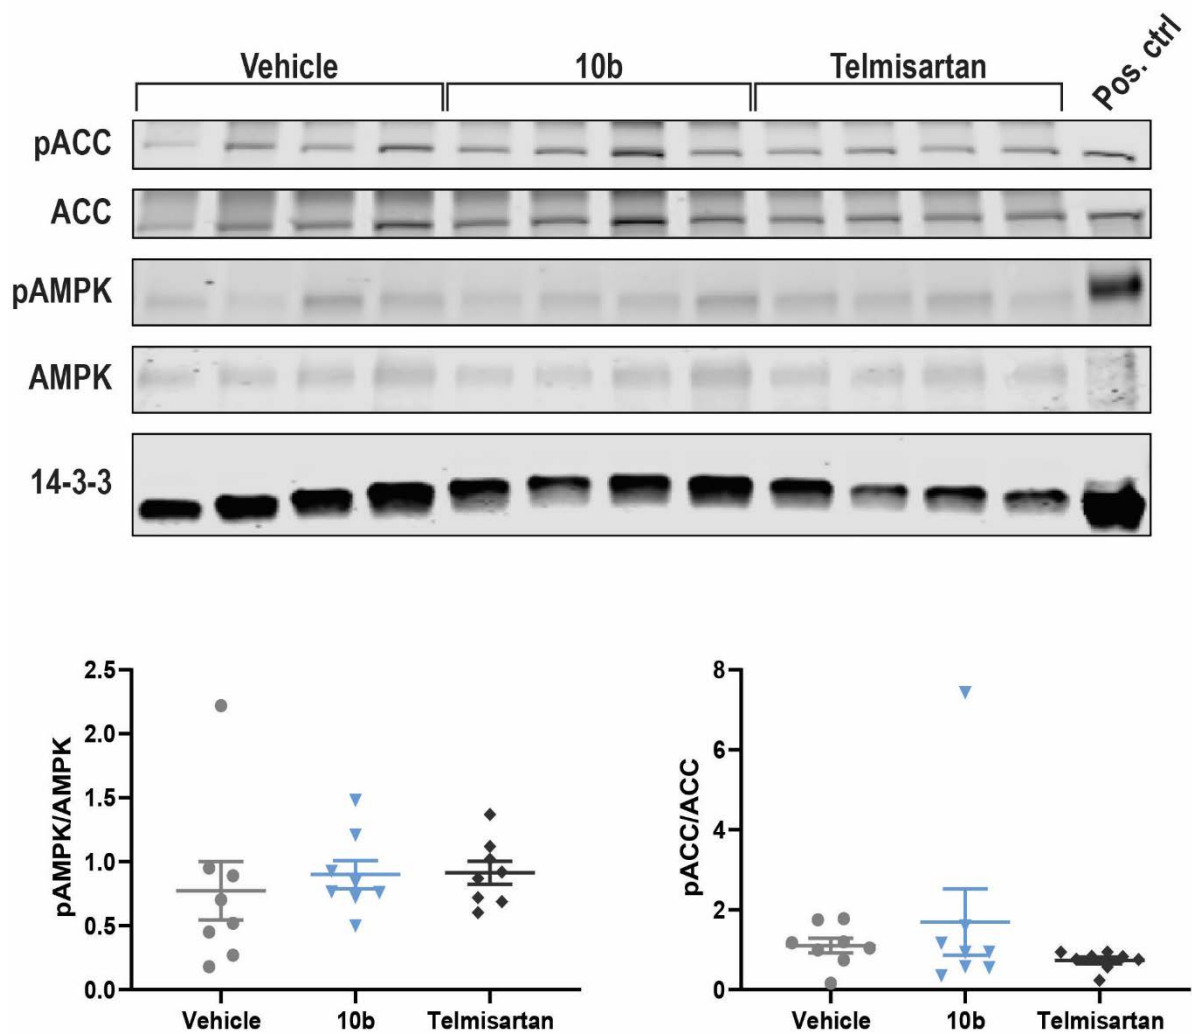

**Figure S3. AMPK is not activated in liver tissue of mice treated with 10b in the STAM model.** Liver tissue from mice in each treatment group were assessed for phosphorylated and total ACC and AMPK by western blot. Normal murine liver cells treated with 5  $\mu$ M FCCP for 1 hour were included as a positive control for AMPK activation. Densitometry was performed on samples from n=8 male mice per group. Statistical significance was assessed by Kruskal-Wallis test with Dunn's correction for multiple comparisons for non-parametric data.

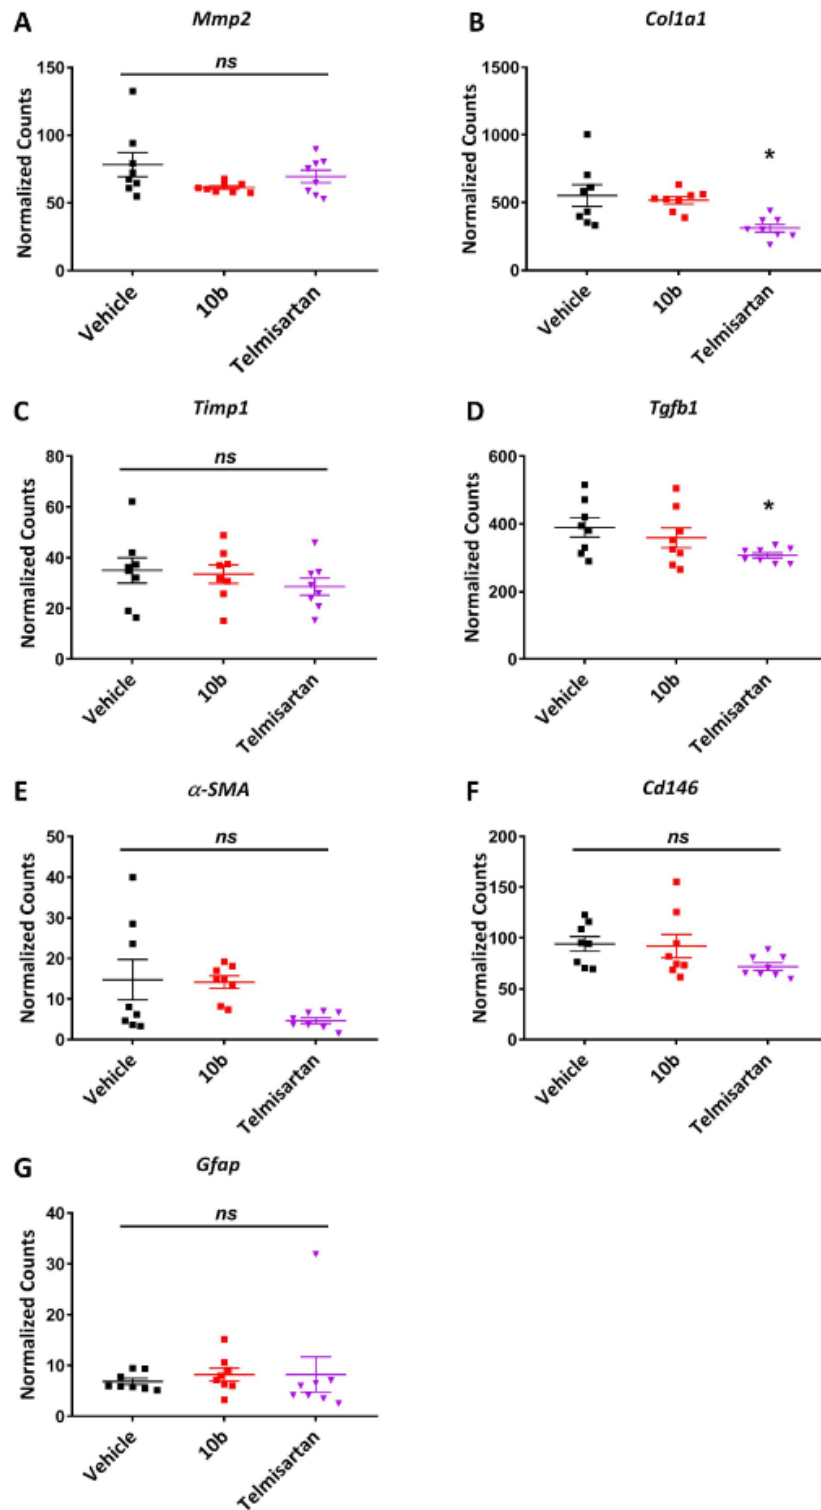

**Figure S4. 10b and telmisartan effects on liver fibrosis marker gene expression.** Liver tissue was evaluated for mRNA expression of A) matrix metalloproteinase 2 (*Mmp2*), B) tissue inhibitor matrix metalloproteinase 1 (*Timp1*), C) collagen 1A1 (*Col1a1*); D) transforming growth factor  $\beta$ 1 (*Tgfb1*), E) alpha-smooth muscle actin ( $\alpha$ -SMA), F) cluster of differentiation 146 (*Cd146*), and G) glial fibrillary acidic protein (*Gfap*). Results are shown as mean  $\pm$  SEM with one-way ANOVA and Dunnett's post-hoc test. \* $p < 0.05$  vs vehicle.
